# Supplementary material
Source: Springer Nature journal article supplement (https://www.springermedizin.de/resource/supplementary/12880_2009_65_MOESM2_ESM.pdf/9450504)

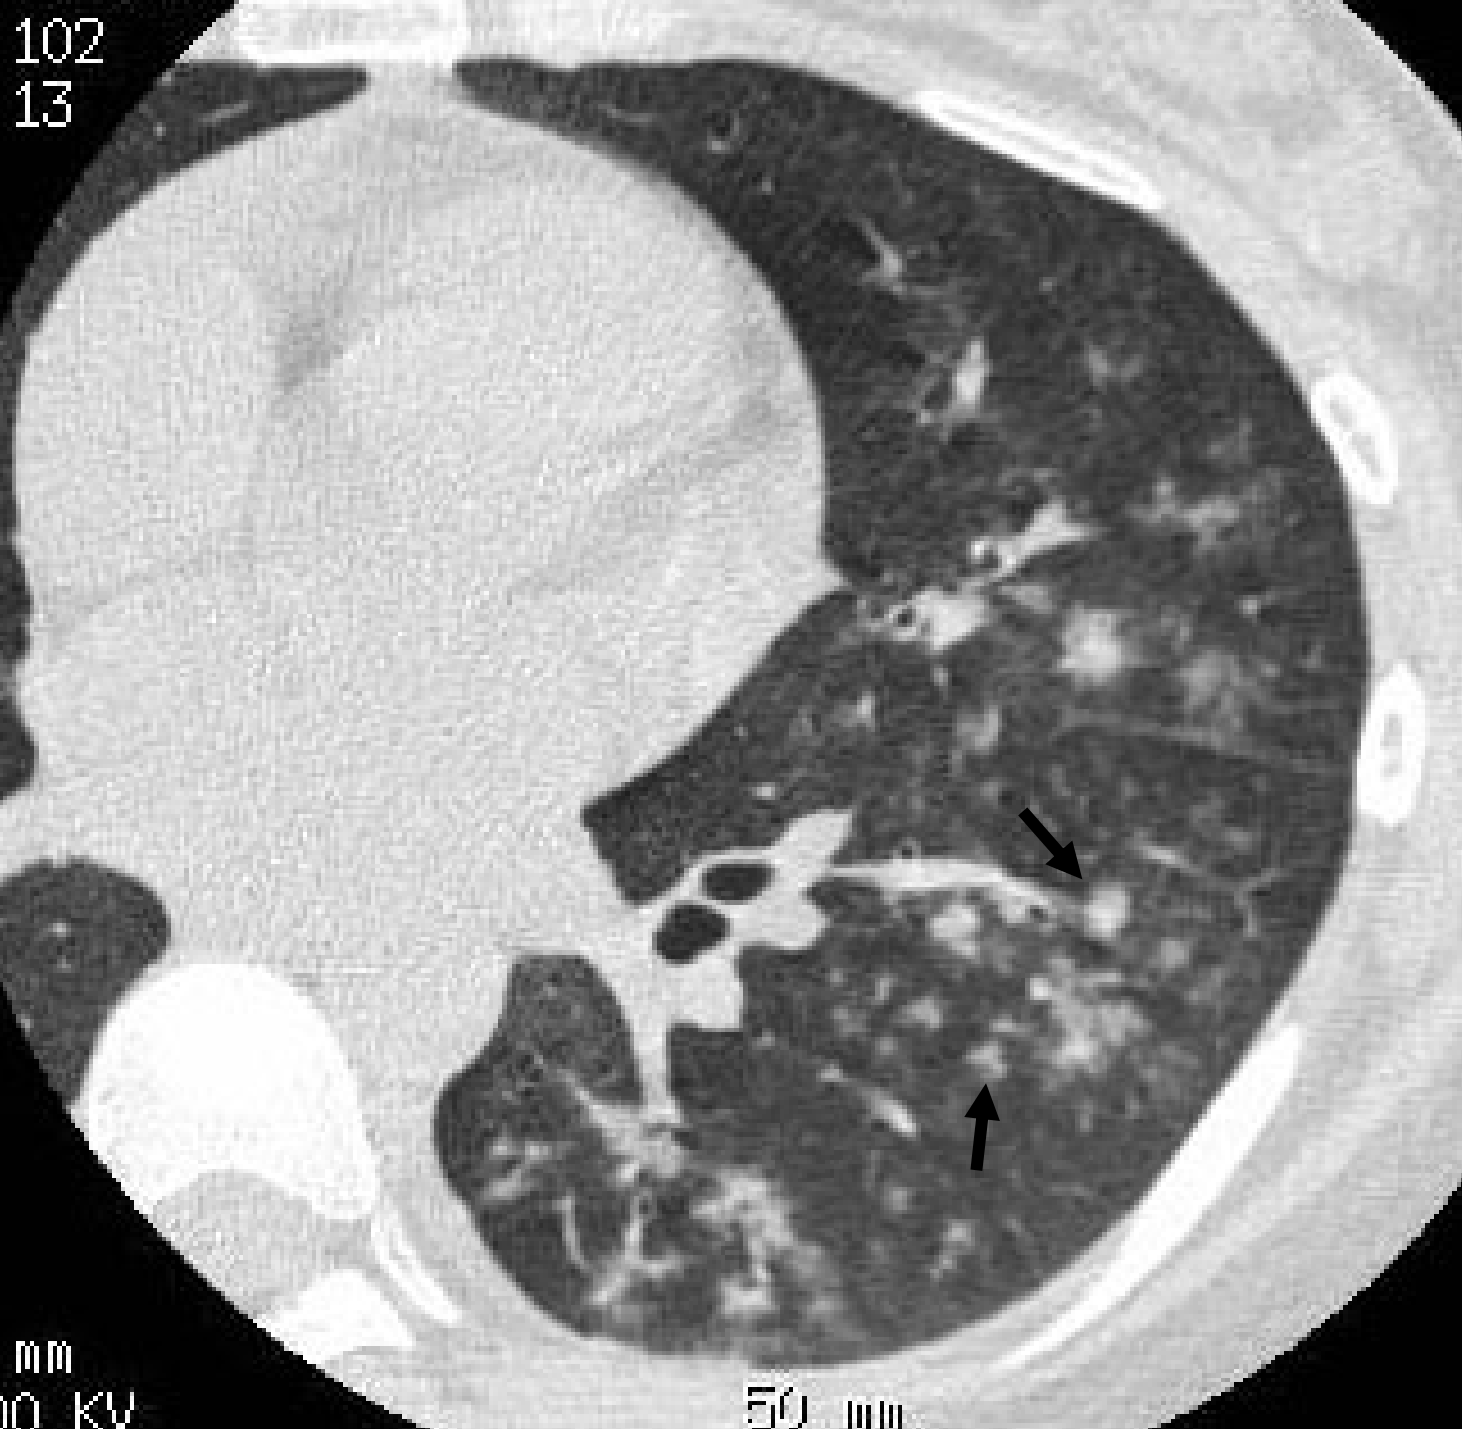

Supplement: MOESM2 [file 9450504]
